# Supplementary material for: LncSHRG promotes hepatocellular carcinoma progression by activating HES6
Source: PubMed Central journal article supplement (PMC5642582; doi:10.18632/oncotarget.19906), 2017-08-03
Supplement: oncotarget-08-70630-s001.pdf [file oncotarget-08-70630-s001.pdf]

## LncSHRG promotes hepatocellular carcinoma progression by activating *HES6*

### SUPPLEMENTARY MATERIALS

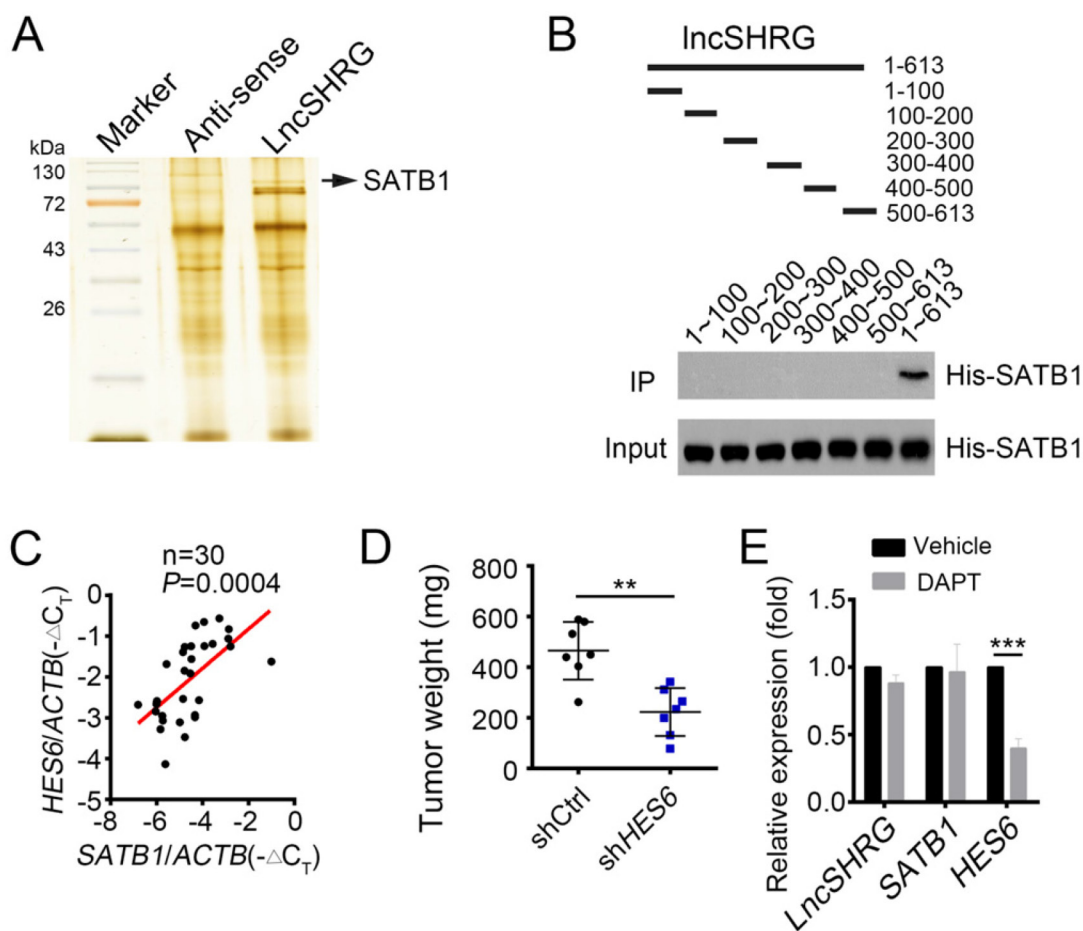

**Supplementary Figure 1: LncSHRG interacts with SATB1.** (A) Biotin-RNA pull-downs were performed using biotin-labeled LncSHRG or anti-sense control. Eluted fractions were resolved by SDS-PAGE, followed by silver staining and mass spectrometry. SATB1 was identified as a potential interactive protein of LncSHRG. (B) Analysis of the interactive region in LncSHRG with SATB1 by domain mapping and RNA pull-down assays. LncSHRG truncates were obtained by T7 transcription *in vitro* and biotin labeled. (C) *SATB1* expression was positively correlated with that of *HES6* in HCC samples. (D) Analysis of mRNA levels of LncSHRG, SATB1 and *HES6*. HCC sample cells were cultured with in the presence of N-[N-(3,5-difluorophenacetyl)-L-alanyl]-S-phenylglycine t-butyl ester (DAPT) (1  $\mu$ M) or not. DAPT was an inhibitor of Notch signaling. (E)  $2 \times 10^6$  *HES6*-depleted or control Hep3B cells were injected into nude mice. The weights of tumors were measured on week 5 after injection. \*\* $p < 0.01$  by two-tailed Student's *t* test. All data presented are shown as means  $\pm$  SD collected from three independent experiments.

Supplementary Table 1: Information of clinical patients

| Sample no. | Age | Gender | Diagnosis | Tumor size(cm) | Stage     |
|------------|-----|--------|-----------|----------------|-----------|
| 1#         | 40  | Male   | HCC       | 20*12.5*8.5    | advanced  |
| 2#         | 60  | Female | HCC       | 2.5*2.5*1.5    | middle-ad |
| 3#         | 54  | Male   | HCC       | 8.4*8.2*7.6    | middle-ad |
| 4#         | 62  | Male   | HCC       | 2.6*2.3*1.8    | early-mid |
| 5#         | 37  | Male   | HCC       | 10*8*8         | early-mid |
| 6#         | 56  | Male   | HCC       | 5*4.5*4        | advanced  |
| 7#         | 53  | Male   | HCC       | 9*9*6.5        | middle-ad |
| 8#         | 54  | Male   | HCC       | 6*5.8*5.5      | middle-ad |
| 9#         | 31  | Female | HCC       | 9.5*8.5*5.8    | middle-ad |
| 10#        | 41  | Male   | HCC       | 2.5*1.5*2      | early     |
| 11#        | 36  | Female | HCC       | 2.2*1.2*1      | early     |
| 12#        | 54  | Male   | HCC       | 13*11*9        | middle-ad |
| 13#        | 68  | Female | HCC       | 2.5*2.4*1.8    | early     |
| 14#        | 64  | Female | HCC       | 1.9*1.5*1      | early     |
| 15#        | 51  | Male   | HCC       | 2.2*1.7*1.6    | early-mid |
| 16#        | 50  | Male   | HCC       | 6.5*5.5*4      | early-mid |
| 17#        | 43  | Male   | HCC       | 3*2.5*2        | early-mid |
| 18#        | 53  | Male   | HCC       | 3*3*2          | early-mid |
| 19#        | 49  | Male   | HCC       | 8.5*5.5*4.1    | middle-ad |
| 20#        | 71  | Male   | HCC       | 4*3*3          | early-mid |
| 21#        | 76  | Male   | HCC       | 11*8*7.5       | middle-ad |
| 22#        | 60  | Male   | HCC       | 3*3*2.5        | early-mid |
| 23#        | 60  | Male   | HCC       | 1.2*1*0.9      | early     |
| 24#        | 61  | Male   | HCC       | 7*7*5.5        | middle-ad |
| 25#        | 42  | Male   | HCC       | 4.3*4.5*4      | early-mid |
| 26#        | 49  | Male   | HCC       | 4*2.5*3        | early     |
| 27#        | 61  | Male   | HCC       | 10*7*6         | middle-ad |
| 28#        | 57  | Male   | HCC       | 4*3*3          | advanced  |
| 29#        | 61  | Female | HCC       | 3*2.5*2        | advanced  |
| 30#        | 49  | Male   | HCC       | 2.5*2.2*2.1    | early     |

Supplementary Table 2: Real time PCR primers used in this study

| Genes          | Forward                         | Reverse                       |
|----------------|---------------------------------|-------------------------------|
| <i>lncSHRG</i> | 5'-TCAACAATTAAGACTCTTTGGCAGT-3' | 5'-CTGCCATCTTGACACGAGGT-3'    |
| <i>Actb</i>    | 5'-TCCATCATGAAGTGTGACGT-3'      | 5'-GAGCAATGATCTTGATCTTCAT-3'  |
| <i>HIF1a</i>   | 5'-GAACGTCGAAAAGAAAAGTCTCG-3'   | 5'-CCTTATCAAGATGCGAACTCACA-3' |
| <i>VEGF</i>    | 5'-ATCACGAAGTGGTGAAGTTC-3'      | 5'-TGCTGTAGGAAGTCTCATCTC-3'   |
| <i>TWIST1</i>  | 5'-GTCCGCAGTCTTACGAGGAG-3'      | 5'-GCTTGAGGGTCTGAATCTTGCT-3'  |
| <i>MYC</i>     | 5'-GGCTCCTGGCAAAGGTCA-3'        | 5'-CTGCGTAGTTGTGCTGATGT-3'    |
| <i>CCND2</i>   | 5'-TTTGCCATGTACCCACCGTC-3'      | 5'-AGGGCATCACAAGTGAGCG-3'     |
| <i>TCF1</i>    | 5'-CTGGCTTCTACTCCCTGACCT-3'     | 5'-ACCAGAACCTAGCATCAAGGA-3'   |
| <i>HES6</i>    | 5'-AGCAGGAGCCTGACTCAGTT-3'      | 5'-AGCTCCTGAACCATCTGCTC-3'    |
| <i>HEY1</i>    | 5'-GTTCGGCTCTAGGTTCCATGT-3'     | 5'-CGTCGGCGCTTCTCAATTATTC-3'  |
| <i>NRARP</i>   | 5'-TCAACGTGAACTCGTTTCGGG-3'     | 5'-ACTTCGCCTTGGTGTGATGAGAT-3' |
| <i>GLI1</i>    | 5'-TGGATATGATGGTTGGCAAGTG-3'    | 5'-ACAGACTCAGGCTCAGGCTTCT-3'  |
| <i>PTCH1</i>   | 5'-CCACAGAAGCGCTCCTACA-3'       | 5'-CTGTAATTCGCCCCTTCC-3'      |
| <i>GLI3</i>    | 5'-GAAGTGCTCCACTCGAACAGA-3'     | 5'-GTGGCTGCATAGTGATTGCG-3'    |
| <i>Satb1</i>   | 5'-TGATTTGTGACGCACCCTCA-3'      | 5'-AGCAAGGCAGAAACATCCCC-3'    |

Supplementary Table 3: Primers used for *HES6* promoter analysis in this study

| Region      | Forward                        | Reverse                       |
|-------------|--------------------------------|-------------------------------|
| -2000~-1800 | 5'-TTAATGTACACAAATCAGTAGC-3'   | 5'-CATCGTAGAGGTCTTTTGATTCC-3' |
| -1700~-1500 | 5'-ACAAGAGCGAAACTCCCTCTG-3'    | 5'-GGGATTGCATTGAATTTGTAGATT3' |
| -1400~-1200 | 5'-AAGGCCATAGTTACCAAAACAG-3'   | 5'-ATGTGTTGAAAAGGGTGTCCCTT-3' |
| -1100~-900  | 5'-CTAGAAGATAAACTGGATAA-3'     | 5'-TTACTCTACTGACTGTTCCCT-3'   |
| -800~-600   | 5'-TAATCCCTAACCCCAACCT-3'      | 5'-AAGGTTGGTGTTAGGGGTAA-3'    |
| -500~-300   | 5'-AATGCTGCATTTGTCTTCCGAGGC-3' | 5'-AGTGTGGAAAACAGGAAACCA-3'   |
| -200~0      | 5'-AGGAGAACGCTGCTCTGCCTTAC-3   | 5'-CGAGGGCGGAGCAGTGTCT-3'     |
